# Supplementary material
Source: publisher site journal article supplement (https://www.dovepress.com/article/336626)
Supplement: Supplementary file 1 [file get_supplementary_file.php]

## Supplementary data

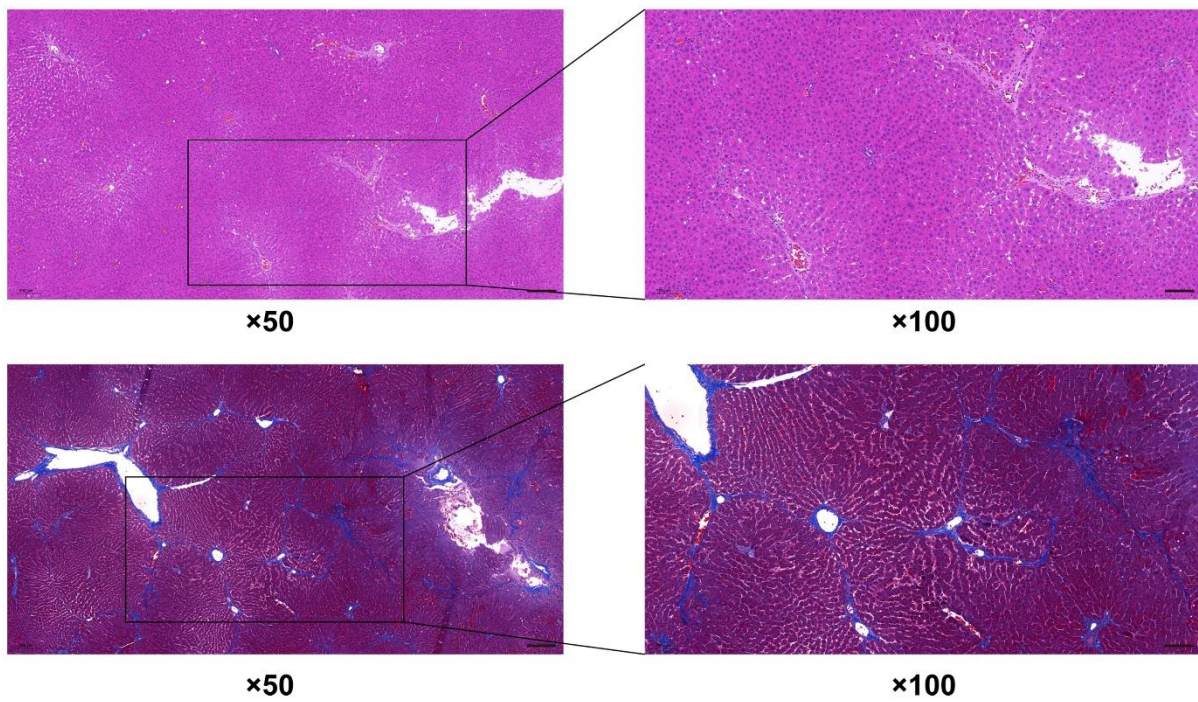

**Figure S1** HE and MT staining of liver biopsy of the treatment groups (magnification,  $\times 50$  and  $\times 100$ ; scale bar=200 and 100  $\mu\text{m}$ ).

**Abbreviations:** HE staining, hematoxylin and eosin staining; MT staining, masson's trichrome staining.

Normal QQ plot of relative protein expression (HMGB1 / Histone H3)

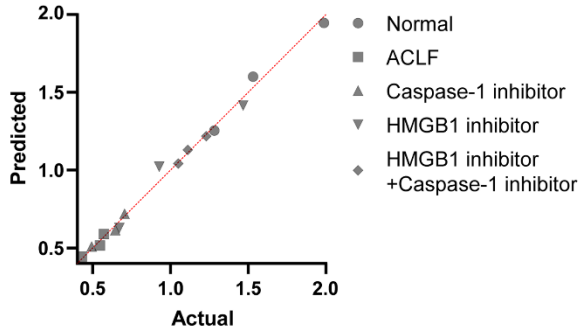

Normal QQ plot of relative protein expression (HMGB1 / GAPDH)

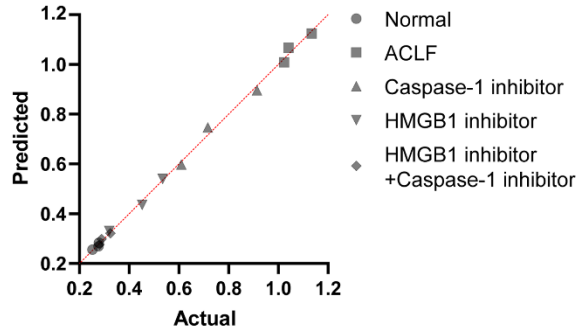

Normal QQ plot of relative mRNA expression (HMGB1 /  $\beta$ -actin)

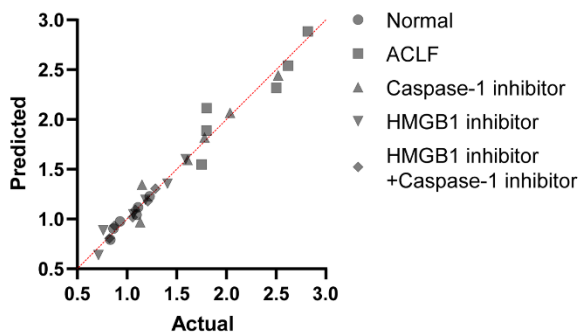

Normal QQ plot of HMGB-1 in serum

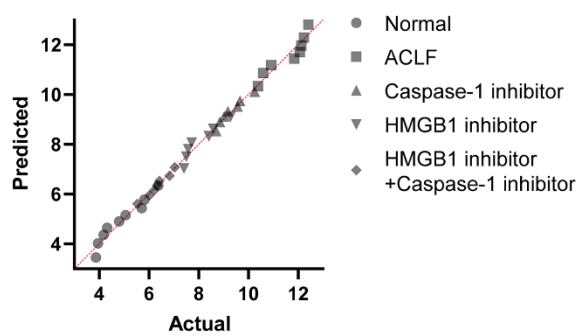

Normal QQ plot of TLR4 in serum

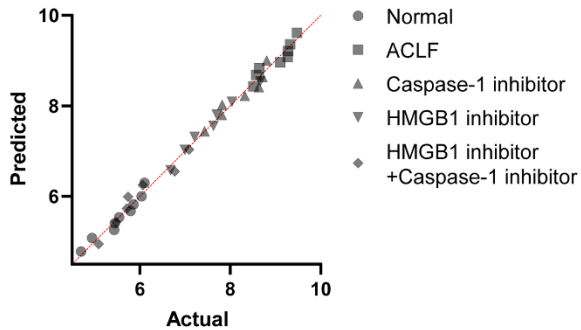

Normal QQ plot of RAGE in serum

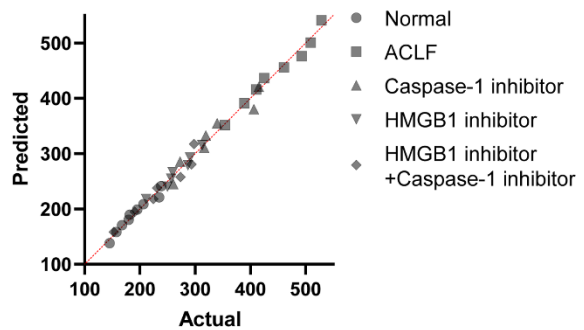

Normal QQ plot of relative protein expression (TLR4 / GAPDH)

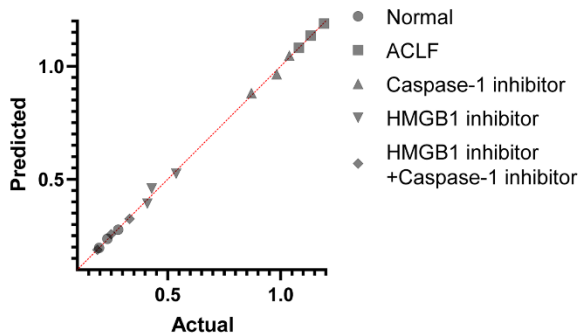

Normal QQ plot of relative protein expression (RAGE / GAPDH)

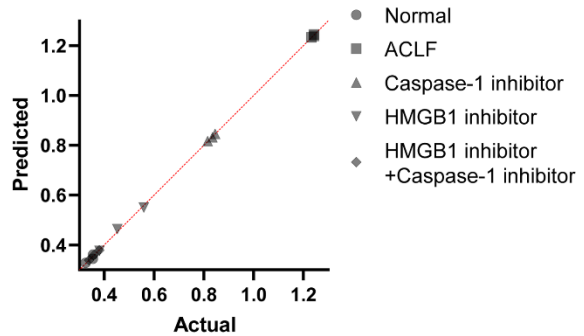

Normal QQ plot of relative protein expression (GSDMD / GAPDH)

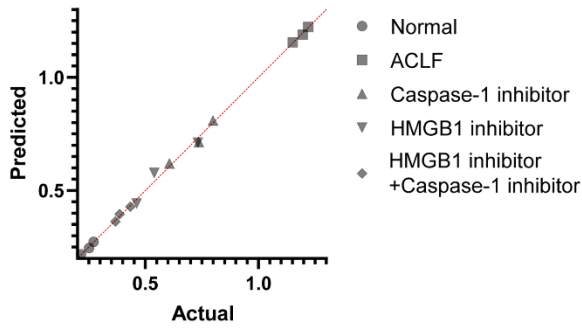

Normal QQ plot of relative protein expression (GSDMD-N / GAPDH)

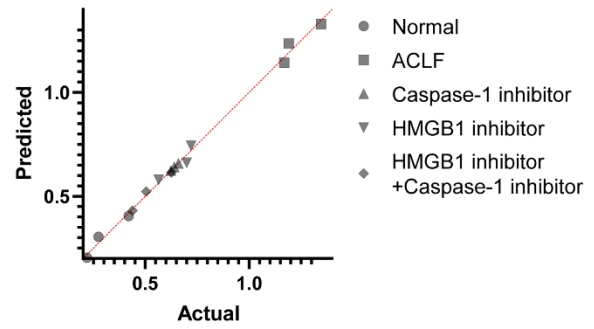

Normal QQ plot of percentage of the GSDMD-positive cells (%)

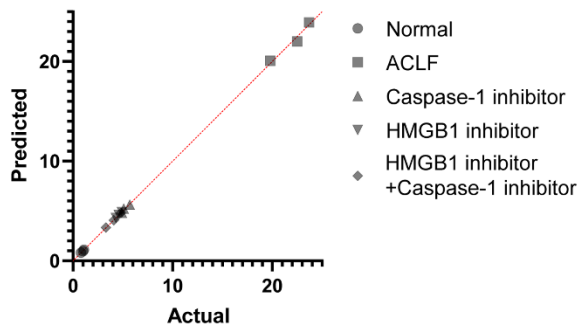

Normal QQ plot of serum LDH

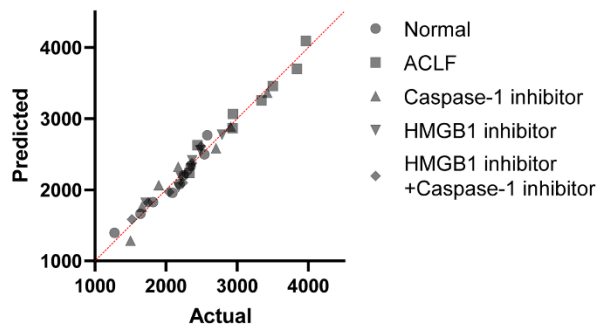

Normal QQ plot of IL-1 $\beta$  in liver tissue

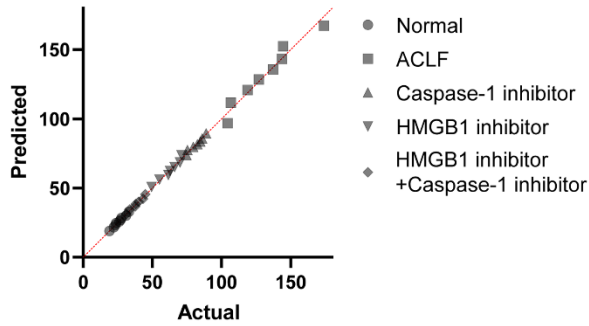

Normal QQ plot of IL-18 in liver tissue

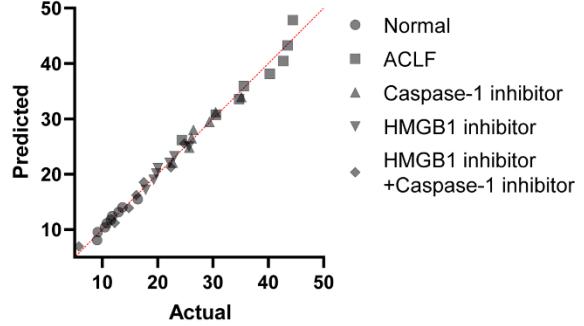

Normal QQ plot of relative protein expression (pro-IL-1 $\beta$  / GAPDH)

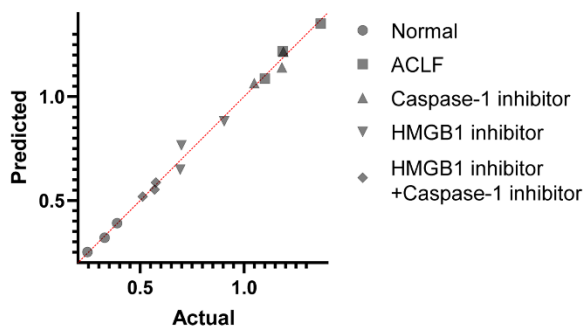

Normal QQ plot of relative protein expression (IL-1 $\beta$  / GAPDH)

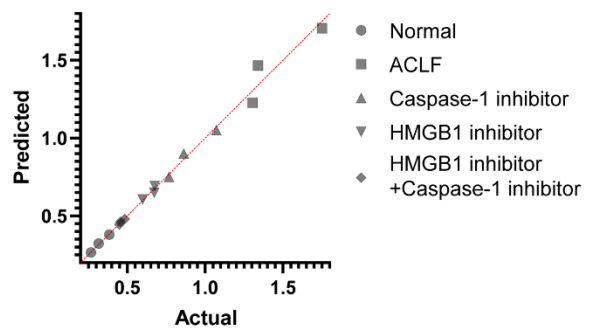

Normal QQ plot of relative protein expression (IL-18 / GAPDH)

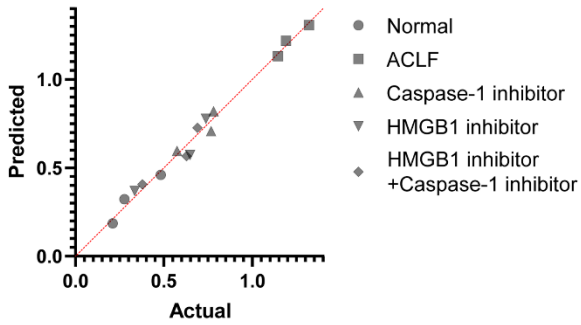

Normal QQ plot of relative mRNA expression (IL-1 $\beta$  /  $\beta$ -actin)

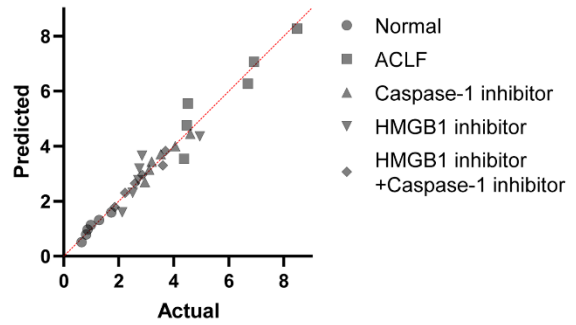

Normal QQ plot of relative mRNA expression (IL-18 /  $\beta$ -actin)

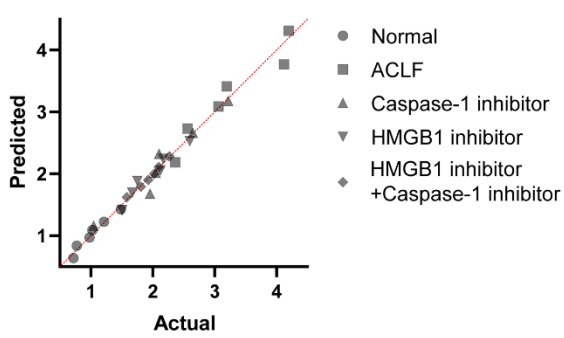

Normal QQ plot of percentage of pyroptotic hepatocytes (%)

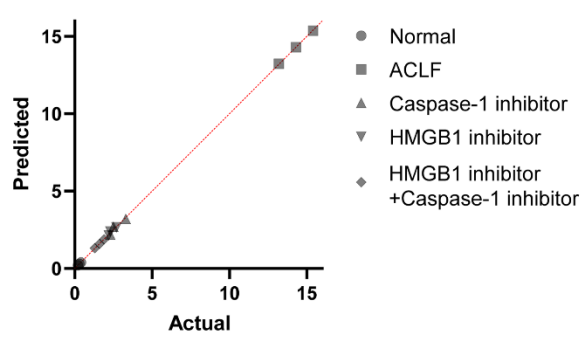

Normal QQ plot of serum ALT

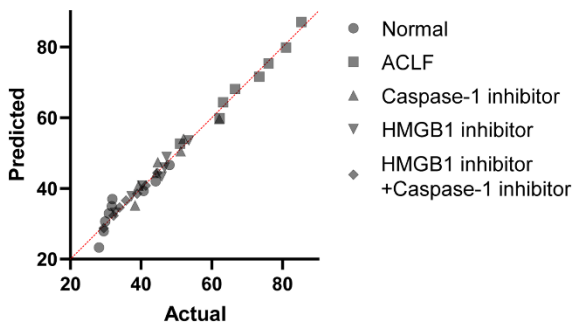

Normal QQ plot of serum AST

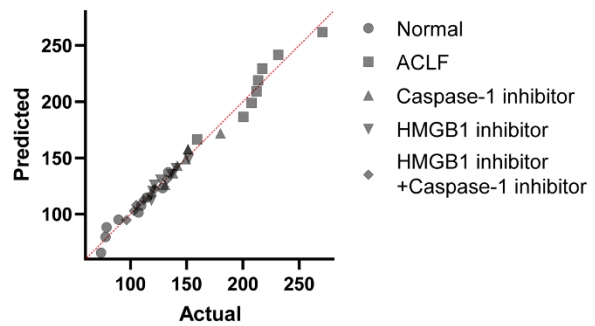

Normal QQ plot of serum TBIL

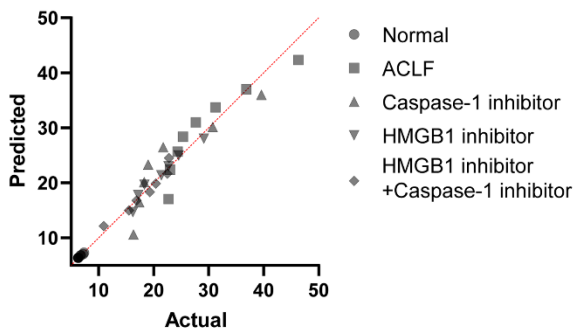

Normal QQ plot of serum ALB

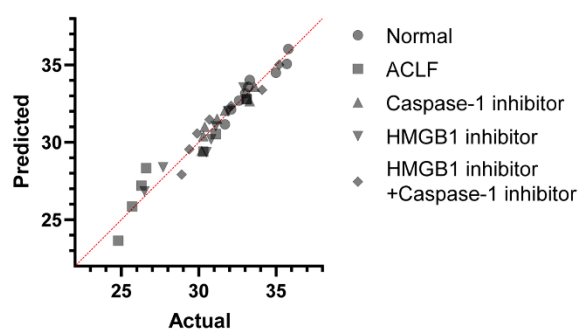

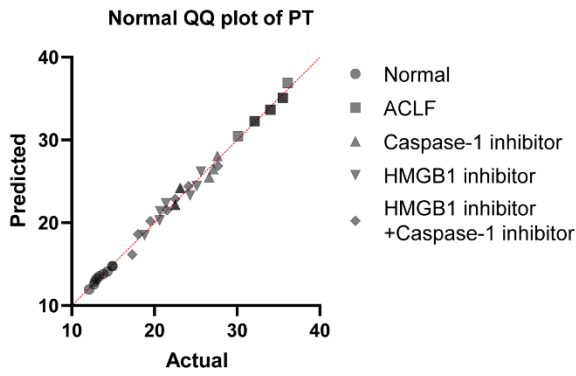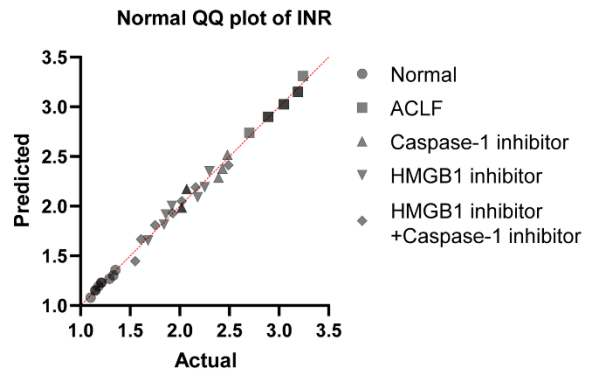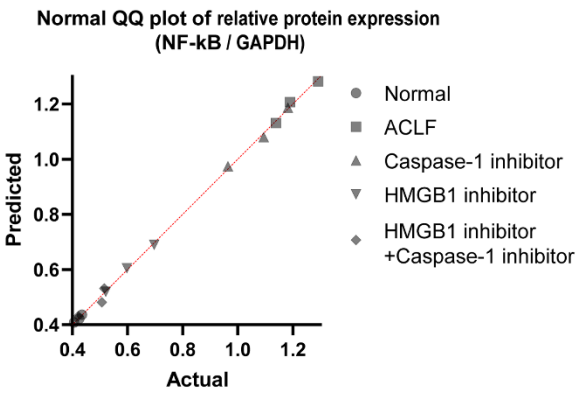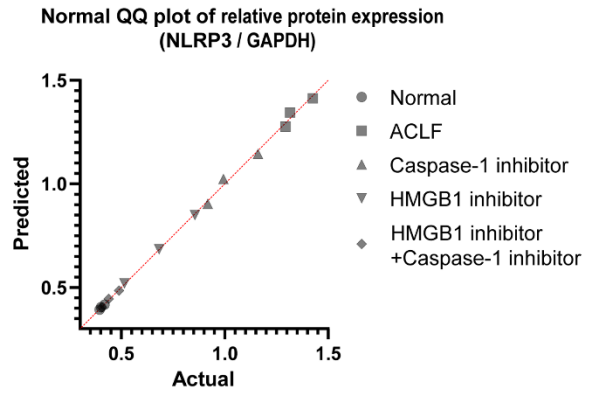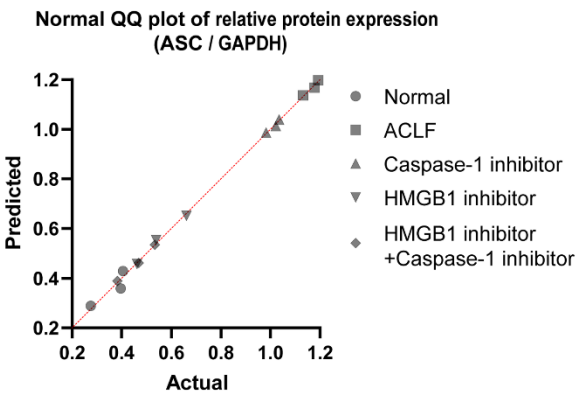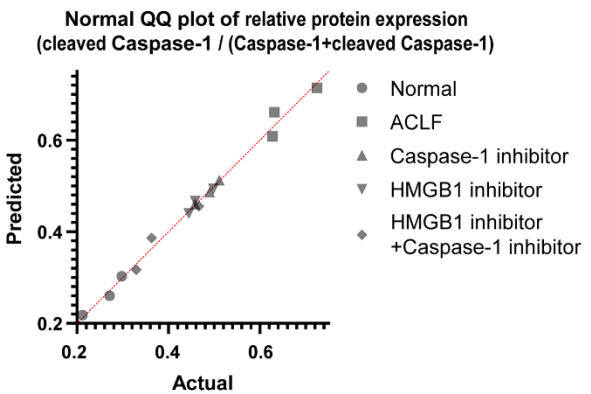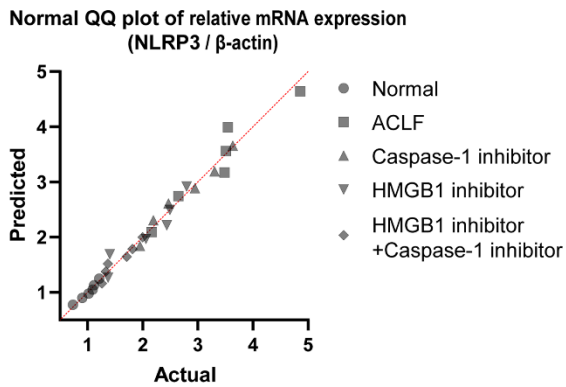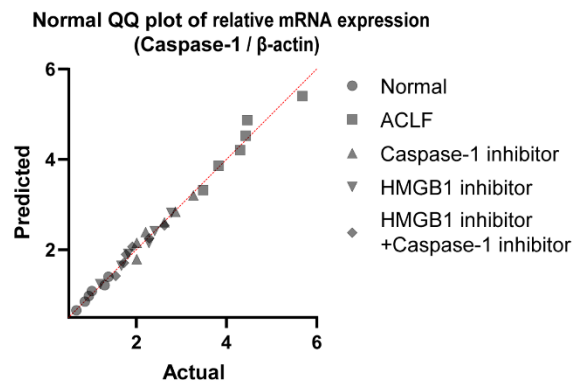

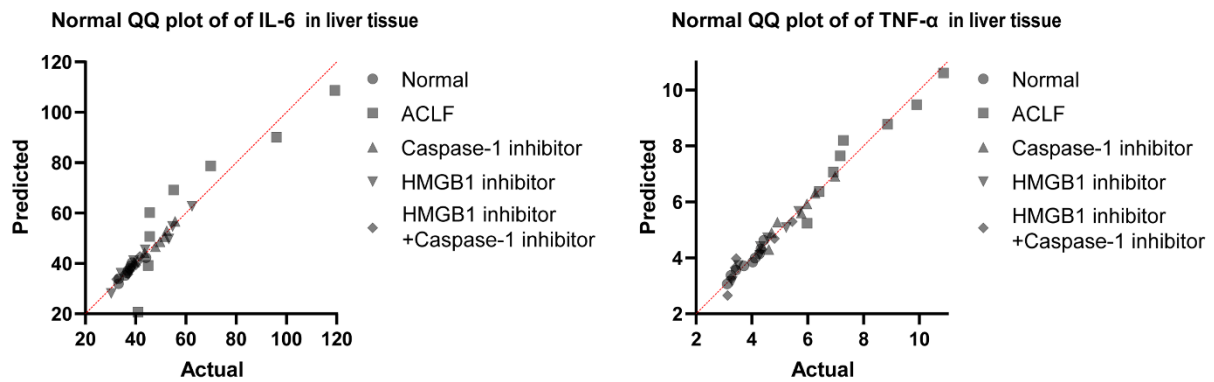

**Figure S2** QQ plots were used to test the normality of experimental data.

**Abbreviations:** HMGB1, High mobility group box-1; ACLF, acute-on-chronic liver failure; TLR4, Toll-like receptor 4; RAGE, receptor for advanced glycation end-products; GSDMD, Gasdermin D; LDH, lactate dehydrogenase; IL-1 $\beta$ , interleukin-1  $\beta$ ; IL-18, interleukin-18; ALT, alanine aminotransferase; AST, aspartate aminotransferase; TBIL, total bilirubin; ALB, albumin; PT, prothrombin time; INR, international normalized ratio; ASC, the adaptor protein apoptosis-associated speck-like protein containing a caspase recruitment domain; IL-6, interleukin-6; TNF- $\alpha$ , tumor necrosis factor- $\alpha$ .
